# Supplementary material for: Potential benefits of great circle routes to reduce fuel consumption and aircraft emissions in mainland China
Source: Research Square preprint supplement (doi:10.21203/rs.3.rs-6538724/v1), 2025-05-06
Supplement: Supplementary file 1 [file e1296ec2429a37c129727f88.docx]

**Figure S1. Fuel consumption and wind data from 2019 to 2023.** **a,** Fuel consumption for A320 flights along WCRs and GCRs excluding wind effects. **b,** Fuel consumption for A320 flights along WCRs considering wind effects. **c,** Fuel consumption for A320 flights along GCRs considering wind effects. The data gaps in **b** and **c** are due to the absence of A320 flights along specific flight routes.

**Figure S2. Spatial distribution of aircraft emissions (CO2, water vapor, CO, and HC) in 2019 with a spatial resolution of 0.25°×0.25°. a-d**, Emission distributions within the 0-2 km altitude range. **e-h**, Emission distributions during the cruise phase based on WCRs. **i-l**, Emission distributions during the cruise phase based on GCRs.





**Figure S3.** **Aircraft emissions during the cruise phase over different cities in 2019 with a spatial resolution of 2°×2°. a-g**, Aircraft emissions such as CO2 (**a**), water vapor (**b**), NOx (**c**), SOx (**d**), CO (**e**), HC (**f**), and PM (**g**).
